# Supplementary material for: The synthesis and structure–property relation analysis of metal chalcohalide crystals Cs2InPS4X2 (X = Cl, Br) with mixed anions
Source: Royal Society of Chemistry journal article supplement (doi:10.1039/d2dt00078d), 2022-01-01
Supplement: d2dt00078d3.pdf [file d2dt00078d3.pdf]

***Supporting Information for***

**The synthesis and structure-property relation analysis of metal chalcogenide crystals**

**$\text{Cs}_2\text{InPS}_4\text{X}_2$  (X = Cl, Br) with mixed anions**

Chunlan Tang,<sup>a,b</sup> Wenhao Xing,<sup>b</sup> Naizheng Wang,<sup>c,d</sup> Jian Tang,<sup>b</sup> Zheshuai Lin,<sup>c,d</sup> Jieyun

Wu,<sup>a,\*</sup> Wenlong Yin,<sup>b,e,\*</sup> and Bin Kang.<sup>b,e</sup>

<sup>a</sup> School of Optoelectronic Science and Engineering, University of Electronic Science and Technology of China, Chengdu 611731, People's Republic of China.

<sup>b</sup> Institute of Chemical Materials, China Academy of Engineering Physics, Mianyang 621900, People's Republic of China.

<sup>c</sup> University of Chinese Academy of Sciences Beijing 100190, P. R. China.

<sup>d</sup> Technical Institute of Physics and Chemistry, Chinese Academy of Sciences, Beijing 100190, China.

<sup>e</sup> Key Laboratory of Science and Technology on High Energy Laser, China Academy of Engineering Physics, Mianyang 621900, China.

---

\* Corresponding author.

*E-mail address:* [jieyunwu@uestc.edu.cn](mailto:jieyunwu@uestc.edu.cn) (Jieyun Wu), [wlyin@ceap.cn](mailto:wlyin@ceap.cn) (Wenlong Yin).

1. Table S1
2. Table S2
3. Table S3
4. Table S4
5. Fig. S1

1. Table S1 Atomic coordinates, equivalent isotropic displacement parameters and bond valence sums (BVS) for Cs<sub>2</sub>InPS<sub>4</sub>Cl<sub>2</sub>.

| Atom | Wyckoff position | <i>x</i>    | <i>y</i>    | <i>z</i>   | $U_{\text{eq}}$ (Å <sup>2</sup> ) <sup>a</sup> | BVS   |
|------|------------------|-------------|-------------|------------|------------------------------------------------|-------|
| In   | 4e               | 0.6883(3)   | 0.49799(3)  | 0.44549(2) | 0.022(8)                                       | 3.13  |
| P    | 4e               | 0.63516(10) | 0.4093(13)  | 0.63873(6) | 0.0205(2)                                      | 5.28  |
| S1   | 4e               | 0.53706(10) | 0.27084(13) | 0.54177(6) | 0.025(2)                                       | -1.93 |
| S2   | 4e               | 0.72487(12) | 0.27517(14) | 0.73178(6) | 0.0305(2)                                      | -2.17 |
| S3   | 4e               | 0.78773(11) | 0.54875(15) | 0.58805(6) | 0.0302(2)                                      | -2.21 |
| S4   | 4e               | 0.4779(11)  | 0.56143(15) | 0.6774(6)  | 0.0303(2)                                      | -2.16 |
| Cs1  | 4e               | 0.86102(3)  | 0.00384(4)  | 0.58954(2) | 0.03719(9)                                     | 1.05  |
| Cs2  | 4e               | 1.0758(3)   | 0.50693(4)  | 0.77278(2) | 0.03799(9)                                     | 0.97  |
| Cl1  | 4e               | 0.83828(11) | 0.256(14)   | 0.40326(7) | 0.0337(2)                                      | -0.97 |
| Cl2  | 4e               | 0.82882(11) | 0.73668(14) | 0.39243(7) | 0.0341(2)                                      | -0.98 |

<sup>a</sup>  $U_{\text{eq}}$  is defined as one-third of the trace of the orthogonalized  $U_{ij}$  tensor.

**2. Table S2** Atomic coordinates, equivalent isotropic displacement parameters and bond valence sums (BVS) for Cs<sub>2</sub>InPS<sub>4</sub>Br<sub>2</sub>.

| Atom | Wyckoff position | <i>x</i>   | <i>y</i>    | <i>z</i>   | $U_{\text{eq}}$ (Å <sup>2</sup> ) <sup>a</sup> | BVS   |
|------|------------------|------------|-------------|------------|------------------------------------------------|-------|
| In   | 4e               | 0.68268(2) | 0.5001(3)   | 0.44506(2) | 0.02251(6)                                     | 3.35  |
| P    | 4e               | 0.36414(8) | 0.41032(10) | 0.36164(5) | 0.02022(16)                                    | 5.27  |
| S1   | 4e               | 0.46158(9) | 0.27594(10) | 0.45899(5) | 0.02546(18)                                    | -1.90 |
| S2   | 4e               | 0.27319(9) | 0.2773(10)  | 0.26947(5) | 0.02834(18)                                    | -2.17 |
| S3   | 4e               | 0.51639(9) | 0.55702(12) | 0.32225(5) | 0.0301(2)                                      | -2.14 |
| S4   | 4e               | 0.21811(9) | 0.55034(12) | 0.41183(5) | 0.03012(19)                                    | -2.18 |
| Cs1  | 4e               | 0.55931(3) | 0.00119(3)  | 0.2732(2)  | 0.03741(7)                                     | 1.03  |
| Cs2  | 4e               | 0.35176(3) | 0.49998(3)  | 0.0912(2)  | 0.03712(7)                                     | 1.07  |
| Br1  | 4e               | 0.82737(4) | 0.25308(4)  | 0.39072(2) | 0.03299(9)                                     | -1.17 |
| Br2  | 4e               | 0.83779(4) | 0.74712(4)  | 0.40035(2) | 0.03308(9)                                     | -1.16 |

<sup>a</sup>  $U_{\text{eq}}$  is defined as one-third of the trace of the orthogonalized  $U_{ij}$  tensor.

**3. Table S3** Selected band distances (Å) and band angles (°) for Cs<sub>2</sub>InPS<sub>4</sub>Cl<sub>2</sub>.

|                                      |            |                           |            |
|--------------------------------------|------------|---------------------------|------------|
| In–S1                                | 2.8668(11) | Cs1–S4 <sup>4</sup>       | 4.0030(11) |
| In–S1 <sup>2</sup>                   | 2.8374(10) | Cs1–Cl1                   | 3.6257(11) |
| In–S3                                | 2.4675(10) | Cs1–Cl1 <sup>3</sup>      | 3.5144(11) |
| In–S4 <sup>2</sup>                   | 2.4819(10) | Cs1–Cl2 <sup>1</sup>      | 3.5822(11) |
| In–Cl1                               | 2.5129(11) | Cs1–Cl2 <sup>5</sup>      | 3.8365(12) |
| In–Cl2                               | 2.5063(11) | Cs2–S1 <sup>6</sup>       | 3.9216(11) |
| P1–S1                                | 2.0680(14) | Cs2–S2 <sup>6</sup>       | 3.5548(12) |
| P1–S2                                | 1.9741(14) | Cs2–S2                    | 3.8154(12) |
| P1–S3                                | 2.0658(15) | Cs2–S3                    | 3.8986(11) |
| P1–S4                                | 2.0691(14) | Cs2–S4 <sup>4</sup>       | 3.6177(12) |
| Cs1–S1                               | 3.7524(10) | Cs2–Cl1 <sup>7</sup>      | 3.7422(12) |
| Cs1–S2                               | 3.5039(11) | Cs2–Cl1 <sup>1</sup>      | 3.6001(12) |
| Cs1–S2 <sup>4</sup>                  | 3.6031(11) | Cs2–Cl2 <sup>1</sup>      | 3.5118(12) |
| Cs1–S3 <sup>5</sup>                  | 3.6166(12) | Cs2–Cl2 <sup>8</sup>      | 3.5705(12) |
| S1—In—Cs2 <sup>1</sup>               | 140.42(2)  | S2—P—S4                   | 109.76(6)  |
| S1 <sup>2</sup> —In—Cs2 <sup>1</sup> | 121.41(2)  | S2—P—S3                   | 108.77(6)  |
| S1 <sup>2</sup> —In—S1               | 85.37(3)   | S4—P—Cs1                  | 161.98(5)  |
| Cl1—In—Cs2 <sup>1</sup>              | 54.25(3)   | S4—P—Cs2 <sup>4</sup>     | 85.85(5)   |
| Cl1—In—S1                            | 91.44(3)   | S3—P—Cs1                  | 85.01(5)   |
| Cl1—In—S1 <sup>2</sup>               | 163.52(3)  | S3—P—Cs2 <sup>4</sup>     | 161.07(5)  |
| Cl2—In—Cs2 <sup>1</sup>              | 52.22(3)   | S3—P—S1                   | 104.36(6)  |
| Cl2—In—S1 <sup>2</sup>               | 89.69(3)   | S3—P—S4                   | 113.01(7)  |
| Cl2—In—S1                            | 166.31(3)  | In—Cl1—Cs1                | 99.19(3)   |
| Cl2—In—Cl1                           | 96.77(4)   | In—Cl1—Cs1 <sup>3</sup>   | 156.07(4)  |
| S4 <sup>2</sup> —In—Cs2 <sup>1</sup> | 71.23(3)   | In—Cl1—Cs2 <sup>1</sup>   | 91.25(3)   |
| S4 <sup>2</sup> —In—S1 <sup>2</sup>  | 75.50(3)   | In—Cl1—Cs2 <sup>9</sup>   | 101.53(3)  |
| S4 <sup>2</sup> —In—S1               | 90.88(3)   | Cs1 <sup>3</sup> —Cl1—Cs1 | 71.46(2)   |
| S4 <sup>2</sup> —In—Cl1              | 88.41(4)   | Cs1—Cl1—Cs2 <sup>9</sup>  | 99.47(3)   |

|                         |            |                                          |           |
|-------------------------|------------|------------------------------------------|-----------|
| S4 <sup>2</sup> —In—Cl2 | 100.25(4)  | Cs1 <sup>3</sup> —Cl1—Cs2 <sup>9</sup>   | 101.74(3) |
| S3—In—Cs2 <sup>1</sup>  | 126.19(3)  | Cs1 <sup>3</sup> —Cl1—Cs2 <sup>1</sup>   | 93.88(3)  |
| S3—In—S1                | 75.08(3)   | Cs2 <sup>1</sup> —Cl1—Cs1                | 163.39(3) |
| S3—In—S1 <sup>2</sup>   | 92.85(4)   | Cs2 <sup>1</sup> —Cl1—Cs2 <sup>9</sup>   | 90.98(2)  |
| S3—In—Cl1               | 101.96(4)  | In—Cl2—Cs1 <sup>10</sup>                 | 96.22(3)  |
| S3—In—Cl2               | 92.46(4)   | In—Cl—Cs1 <sup>1</sup>                   | 149.52(4) |
| S3—In—S4 <sup>2</sup>   | 162.58(4)  | In—Cl2—Cs2 <sup>11</sup>                 | 104.40(3) |
| Cs1—P—Cs2 <sup>4</sup>  | 76.160(19) | In—Cl2—Cs2 <sup>1</sup>                  | 93.44(3)  |
| S1—P—Cs1                | 68.92(4)   | Cs1 <sup>1</sup> —Cl2—Cs1 <sup>10</sup>  | 68.31(2)  |
| S1—P—Cs2 <sup>4</sup>   | 70.79(4)   | Cs2 <sup>11</sup> —Cl2—Cs1 <sup>10</sup> | 98.70(3)  |
| S1—P—S4                 | 104.40(6)  | Cs2 <sup>11</sup> —Cl2—Cs1 <sup>1</sup>  | 103.85(3) |
| S2—P—Cs1                | 62.11(4)   | Cs2 <sup>1</sup> —Cl2—Cs1 <sup>10</sup>  | 160.38(3) |
| S2—P—Cs2 <sup>4</sup>   | 60.57(4)   | Cs2 <sup>1</sup> —Cl2—Cs1 <sup>1</sup>   | 95.10(3)  |
| S2—P—S1                 | 116.53(6)  | Cs2 <sup>1</sup> —Cl2—Cs2 <sup>11</sup>  | 95.37(3)  |

Symmetry codes: (1)2-X,1-Y,1-Z; (2)1-X,1-Y,1-Z; (3)2-X, -Y,1-Z; (4)3/2-X,-1/2+Y,3/2-Z;  
(5)+X,-1+Y,+Z; (6)3/2-X,1/2+Y,3/2-Z; (7)1/2+X,1/2-Y,1/2+Z; (8)1/2+X,3/2-Y,1/2+Z; (9)-  
1/2+X,1/2-Y,-1/2+Z; (10)+X,1+Y,+Z; (11)-1/2+X,3/2-Y,-1/2+Z

**4. Table S4** Selected bond distances (Å) and bond angles (°) for Cs<sub>2</sub>InPS<sub>4</sub>Br<sub>2</sub>.

|                                     |             |                                         |             |
|-------------------------------------|-------------|-----------------------------------------|-------------|
| In–S1                               | 2.8489(9)   | Cs1–S4 <sup>2</sup>                     | 3.8548(9)   |
| In–S1 <sup>1</sup>                  | 2.8752(9)   | Cs1–Br1                                 | 3.6757(5)   |
| In–S3                               | 2.4834(8)   | Cs1–Br1 <sup>4</sup>                    | 3.6339(5)   |
| In–S4 <sup>1</sup>                  | 2.4723(8)   | Cs1–Br2 <sup>3</sup>                    | 3.8233(5)   |
| In–Br1                              | 2.6533(4)   | Cs1–Br2 <sup>4</sup>                    | 3.7111(5)   |
| In–Br2                              | 2.6545(4)   | Cs2–S1 <sup>5</sup>                     | 3.7986(9)   |
| P1–S1                               | 2.0664(11)  | Cs2–S2 <sup>5</sup>                     | 3.5193(9)   |
| P1–S2                               | 1.9763(11)  | Cs2–S2                                  | 3.5984(9)   |
| P1–S3                               | 2.0680(12)  | Cs2–S3                                  | 3.9767(9)   |
| P1–S4                               | 2.0712(12)  | Cs2–S4 <sup>2</sup>                     | 3.6600(10)  |
| Cs1–S1                              | 3.9797(9)   | Cs2–Br1 <sup>9</sup>                    | 3.7303(5)   |
| Cs1–S2                              | 3.5716(9)   | Cs2–Br1 <sup>8</sup>                    | 3.8560(5)   |
| Cs1–S2 <sup>2</sup>                 | 3.7193(9)   | Cs2–Br2 <sup>7</sup>                    | 3.7268(4)   |
| Cs1–S3 <sup>3</sup>                 | 3.6784(9)   | Cs2–Br2 <sup>4</sup>                    | 3.6507(4)   |
| Br2—In—S11                          | 91.60(2)    | S4—P—Cs1                                | 160.07(4)   |
| Br2—In—S1                           | 163.89(2)   | S4—P—Cs2 <sup>2</sup>                   | 87.47(4)    |
| Br1—In—Br2                          | 96.333(14)  | S3—P—Cs1                                | 87.33(4)    |
| Br1—In—S11                          | 165.991(19) | S3—P—Cs2 <sup>2</sup>                   | 160.04(4)   |
| Br1—In—S1                           | 90.28(2)    | S3—P—S4                                 | 112.49(5)   |
| S1—In—S11                           | 85.12(3)    | In—Br1—Cs1 <sup>8</sup>                 | 94.016(12)  |
| S41—In—Br2                          | 102.28(3)   | In—Br1—Cs1                              | 101.886(13) |
| S41—In—Br1                          | 91.99(2)    | In—Br1—Cs2 <sup>12</sup>                | 94.679(12)  |
| S4 <sup>1</sup> —In—S1 <sup>1</sup> | 75.00(3)    | In—Br1—Cs2 <sup>3</sup>                 | 149.359(14) |
| S4 <sup>1</sup> —In—S1              | 92.11(3)    | Cs1 <sup>8</sup> —Br1—Cs1               | 99.971(10)  |
| S4 <sup>1</sup> —In—S3              | 161.96(3)   | Cs1—Br1—Cs2 <sup>3</sup>                | 106.866(10) |
| S3—In—Br2                           | 88.92(2)    | Cs1 <sup>8</sup> —Br1—Cs2 <sup>12</sup> | 158.497(13) |
| S3—In—Br1                           | 100.87(3)   | Cs1 <sup>8</sup> —Br1—Cs2 <sup>3</sup>  | 91.283(11)  |
| S3—In—S11                           | 90.78(3)    | Cs1—Br1—Cs2 <sup>12</sup>               | 97.422(10)  |

|                         |            |                                          |             |
|-------------------------|------------|------------------------------------------|-------------|
| S3—In—S1                | 75.39(3)   | Cs2 <sup>3</sup> —Br1—Cs2 <sup>12</sup>  | 71.533(9)   |
| Cs2 <sup>2</sup> —P—Cs1 | 72.726(14) | In—Br2—Cs1 <sup>10</sup>                 | 98.623(12)  |
| S1—P—Cs1                | 70.83(3)   | In—Br2—Cs1 <sup>8</sup>                  | 92.260(12)  |
| S1—P—Cs2 <sup>2</sup>   | 68.46(3)   | In—Br2—Cs2 <sup>11</sup>                 | 97.642(12)  |
| S1—P—S4                 | 104.47(5)  | In—Br2—Cs2 <sup>8</sup>                  | 155.222(15) |
| S1—P—S3                 | 104.69(5)  | Cs1 <sup>8</sup> —Br2—Cs1 <sup>10</sup>  | 95.971(10)  |
| S2—P—Cs1                | 59.39(3)   | Cs1 <sup>8</sup> —Br2—Cs2 <sup>11</sup>  | 162.193(12) |
| S2—P—Cs2 <sup>2</sup>   | 60.71(3)   | Cs2 <sup>8</sup> —Br2—Cs1 <sup>8</sup>   | 91.001(10)  |
| S2—P—S1                 | 116.10(5)  | Cs2 <sup>11</sup> —Br2—Cs1 <sup>10</sup> | 97.123(11)  |
| S2—P—S4                 | 109.07(5)  | Cs2 <sup>8</sup> —Br2—Cs1 <sup>10</sup>  | 105.452(11) |
| S2—P—S3                 | 109.96(5)  | Cs2 <sup>8</sup> —Br2—Cs2 <sup>11</sup>  | 73.900(9)   |

---

Symmetry codes: (1)1-X,1-Y,1-Z; (2)1/2-X, -1/2+Y,1/2-Z; (3)3/2-X, -1/2+Y,1/2-Z; (4)+X,-1+Y,+Z; (5)1-X,1-Y,-Z; (6)1/2-X,1/2+Y,1/2-Z; (7)-1/2+X,3/2-Y,-1/2+Z; (8)3/2-X,1/2+Y,1/2-Z; (9)-1/2+X,1/2-Y,-1/2+Z; (10)+X,1+Y,+Z; (11)1/2+X,3/2-Y,1/2+Z; (12)1/2+X,1/2-Y,1/2+Z

5. Fig. S1

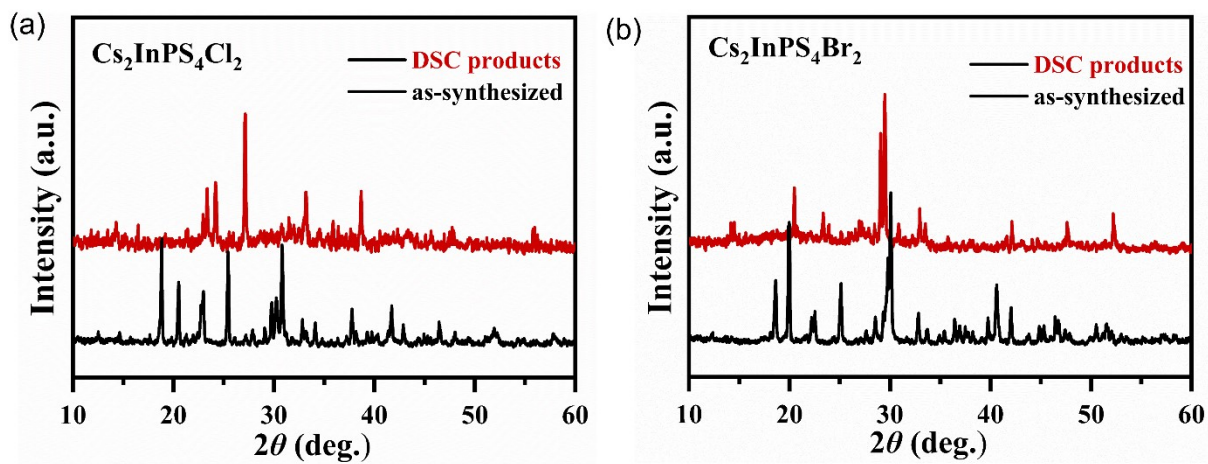

**Fig. S1.** Powder X-ray diffraction patterns of  $\text{Cs}_2\text{InPS}_4\text{X}_2$  ( $\text{X} = \text{Cl}, \text{Br}$ ): as-synthesized (black), and DSC products (red).
